# Supplementary material for: The zombification and reanimation of purple urchins (Strongylocentrotus purpuratus) in response to food availability
Source: Research Square preprint supplement (doi:10.21203/rs.3.rs-452705/v1), 2021-04-29
Supplement: Supplementary file 1 [file f9895ace0016fdd8bdb108bf.docx]

**The zombification and reanimation of purple urchins (*Strongylocentrotus purpuratus*) in response to food availability**

Dillon Dolinar1* and Mathew Edwards1

**Author affiliations:**

1Department of Biology, San Diego State University, 5500 Campanile Dr. San Diego, CA, 92182

Keywords: Kelp Forests, Metabolism, Physiology, Purple Sea Urchin, Respiration, Starvation, Urchin Barren

**Supplemental Materials**

**Figure S1**. Scatterplots with best fit line showing the relationships between individual urchin respiration (mg O2 individual-1) and urchin test diameter (mm) for each feeding treatment (fed, starved) during each of the five sample weeks. “Week 0” measurements were taken before any manipulation occurred to the “Starve” treatment’s feeding regiment. “Week 7” and “Week14” measurements occurred while the “Starve” treatment had no access to food while “Week 19” and “Week 21” measurements occurred while both “starve” and “fed” treatments were receiving equal rations of food.

**Figure S2**. . Scatterplots with best fit line showing the relationships between urchin gonad somatic indices (GSI) and urchin test diameter (mm) for each feeding treatment (fed, starved) during each of the five sample weeks. “Week 0” measurements were taken before any manipulation occurred to the “Starve” treatment’s feeding regiment. “Week 7” and “Week14” measurements occurred while the “Starve” treatment had no access to food while “Week 19” and “Week 21” measurements occurred while both “starve” and “fed” treatments were receiving equal rations of food.
